# Supplementary material for: Multi-cellular natural killer (NK) cell clusters enhance NK cell activation through localizing IL-2 within the cluster
Source: Sci Rep. 2017 Jan 11;7:40623. doi: 10.1038/srep40623 (PMC5225448; doi:10.1038/srep40623)
Supplement: Supplementary Information [file srep40623-s1.pdf]

## ***Supplementary Information***

### **Multi-cellular natural killer (NK) cell clusters enhance NK cell activation through localizing IL-2 within the cluster**

Miju Kim<sup>1, 5</sup>, Tae-Jin Kim<sup>2</sup>, Hye Mi Kim<sup>3</sup>, Junsang Doh<sup>1, 4, \*</sup> and Kyung-Mi Lee<sup>2, \*</sup>

<sup>1</sup>School of Interdisciplinary Bioscience and Bioengineering (I-Bio), Pohang University of Science and Technology, Pohang, Gyeongbuk 790-784, Korea

<sup>2</sup>Global Research Lab, Department of Biochemistry and Molecular Biology, Korea University College of Medicine, Seoul 136-713, Korea

<sup>3</sup>Division of Integrative Biosciences and Biotechnology (IBB), Pohang University of Science and Technology, Pohang, Gyeongbuk 790-784, Korea

<sup>4</sup>Department of Mechanical Engineering, Pohang University of Science and Technology, Pohang, Gyeongbuk 790-784, Korea

<sup>5</sup>Amore-Pacific R&D Centre, Yongin, 17074, Korea

#### **Address for correspondence:**

\*Kyung-Mi Lee, Ph.D: Department of Biochemistry and Molecular Biology, Korea University College of Medicine, Sungbook-Gu Anam-Dong 5Ga, Seoul, 136-705, Korea  
e-mail: [kyunglee@korea.ac.kr](mailto:kyunglee@korea.ac.kr), phone: +82-2-920-6251, Fax +82-920-6252.

\*Junsang Doh, Ph.D: School of Interdisciplinary Bioscience and Bioengineering (I-Bio), Pohang University of Science and Technology, Pohang, Gyeongbuk 790-784, Korea  
e-mail: [jsdoh@postech.ac.kr](mailto:jsdoh@postech.ac.kr), phone: +82-54-279-2189, Fax: +82-54-279-3199.

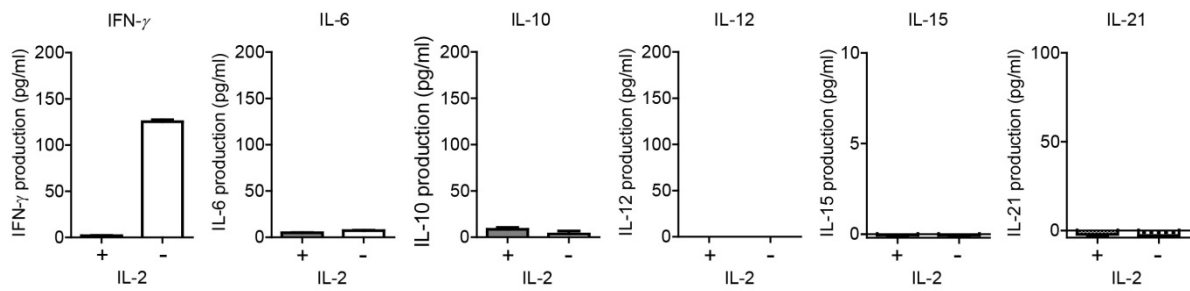

**Figure S1. Cytokine secretion of IL-2-stimulated NK cells.** NK cells were cultured in the presence (50 ng/ml) or absence of IL-2 for 48 h, and concentrations of various cytokines in the supernatant were measured.

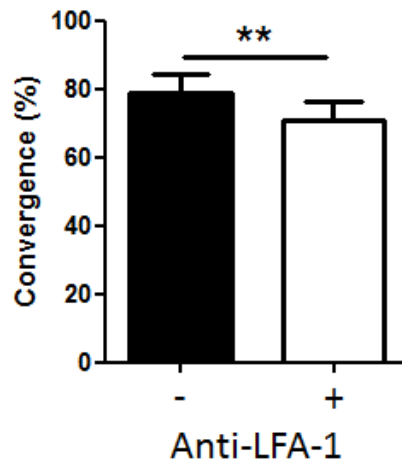

**Figure S2. Effect of anti-LFA-1 treatment on granule convergence of NK cells in social microwells.** NK cells in social microwells were stimulated with IL-2 in the presence (10  $\mu$ g/ml) or absence of anti-LFA-1 (clone: M17/4) for 18 h, and granule convergence was assessed using LysoSensor<sup>TM</sup> Green DND-189. N = 380 (- anti-LFA-1), and N = 369 (+ anti-LFA-1). Error bars: standard deviation. The Mann-Whitney test was performed. \*\*  $p < 0.01$ .

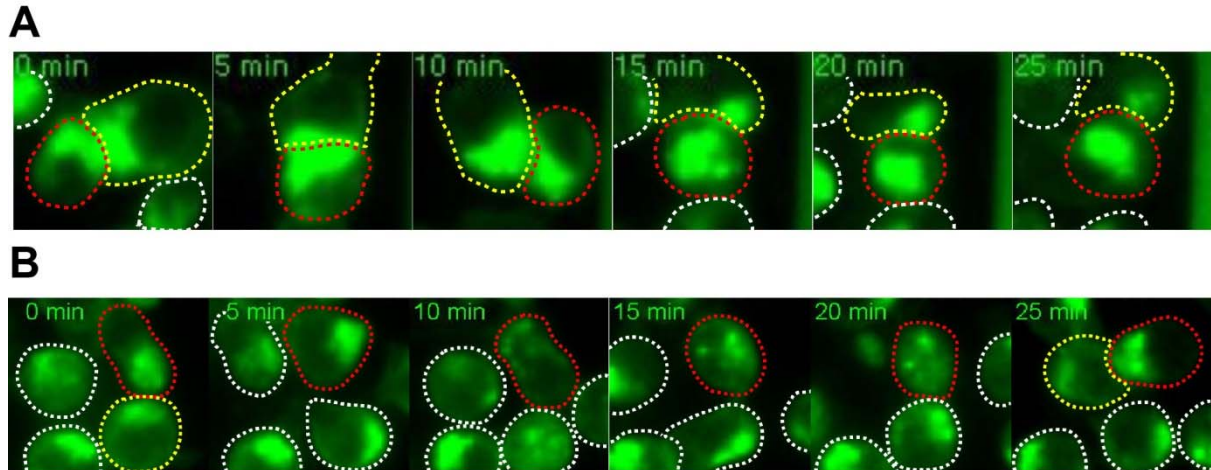

**Figure S3. NK cells in social microwells exhibited dynamic polarization of lytic granules toward neighboring NK cells.** A. Representative time-lapse images showing stable prolonged lytic granule polarization of a NK cell (a red dashed circle) toward a neighboring NK cells (a yellow dashed circle). Bystander NK cell boundaries are marked with white dashed circles. B. Representative time-lapse images showing transient lytic granule convergence/polarization.
